# Supplementary material for: Gut microbiota and metabolites associate with outcomes of immune checkpoint inhibitor–treated unresectable hepatocellular carcinoma
Source: PubMed Central journal article supplement — J Immunother Cancer. 2022 Jun 22;10(6):e004779. doi: 10.1136/jitc-2022-004779 (PMC9226985; doi:10.1136/jitc-2022-004779), 2022-06-22
Supplement: jitc-2022-004779supp006.pdf [file jitc-2022-004779supp006.pdf]

**Table S1. Fecal microbial metabolites of HCC patients in the training cohort**

| Characteristics              | Objective response         | Progressive disease        | <i>p</i> value |
|------------------------------|----------------------------|----------------------------|----------------|
|                              | N = 20                     | N = 21                     |                |
| Primary bile acids (nM)      |                            |                            |                |
| CA                           | 3211.63 (478.30 – 4052.67) | 1466.75 (49.99 – 3467.24)  | 0.083          |
| T-CA                         | 25.71 (8.75 – 87.07)       | 12.4 (4.04 – 54.46)        | 0.177          |
| G-CA                         | 56.62 (20.67 – 126.96)     | 25.44 (3.05 – 86.98)       | 0.123          |
| CDCA                         | 1734.66 (459.99 – 2976.28) | 1371.62 (298.84 – 2393.04) | 0.499          |
| T-CDCA                       | 40.33 (11.16 – 158.81)     | 34.93 (11.49 – 60.68)      | 0.387          |
| G-CDCA                       | 47.41 (15.89 – 175.22)     | 40.90 (10.21 – 198.35)     | 0.665          |
| Secondary bile acids (nM)    |                            |                            |                |
| DCA                          | 1424.18 (5.31 – 1815.73)   | 1307.10 (280.27 – 1927.94) | 0.534          |
| T-DCA                        | 7.38 (1.05 – 29.97)        | 5.49 (1.23 – 28.61)        | 0.771          |
| G-DCA                        | 8.66 (3.99 – 30.91)        | 4.79 (1.80 – 19.28)        | 0.253          |
| LCA                          | 1113.60 (35.39 – 2803.71)  | 1619.57 (161.32 – 3077.74) | 0.449          |
| T-LCA                        | 3.65 (1.66 – 6.07)         | 3.03 (0.99 – 8.31)         | 0.745          |
| G-LCA                        | 2.83 (1.30 – 5.78)         | 3.16 (0.93 – 7.82)         | 0.913          |
| UDCA                         | 2215.20 (998.90 – 5006.04) | 966.73 (214.71 – 2010.27)  | 0.025          |
| T-UDCA                       | 7.90 (3.10 – 26.67)        | 2.49 (1.28 – 4.07)         | 0.005          |
| G-UDCA                       | 5.82 (2.99 – 42.98)        | 4.49 (1.67 – 11.43)        | 0.213          |
| UCA                          | 1638.06 (170.71 – 2507.42) | 215.35 (22.38 – 674.03)    | 0.014          |
| MDCA                         | 385.83 (86.95 – 2247.38)   | 117.26 (31.51 – 256.72)    | 0.027          |
| Short chain fatty acids (mM) |                            |                            |                |
| Lactic acid                  | 0.37 (0.18 – 1.62)         | 0.22 (0.11 – 0.48)         | 0.279          |
| Acetic acid                  | 12.88 (6.97 – 19.47)       | 11.93 (9.39 – 21.88)       | 0.678          |
| Propionic acid               | 4.28 (2.37 – 7.09)         | 4.59 (3.31 – 10.27)        | 0.341          |
| Isobutyric acid              | 0.20 (0.18 – 0.31)         | 0.23 (0.13 – 0.29)         | 0.538          |
| Butyric acid                 | 1.75 (1.15 – 4.36)         | 2.00 (1.39 – 4.33)         | 0.841          |
| 2-Methylbutyric acid         | 0.12 (0.10 – 0.21)         | 0.11 (0.00 – 0.15)         | 0.327          |
| Isovaleric acid              | 0.23 (0.18 – 0.35)         | 0.27 (0.15 – 0.34)         | 1.000          |
| Valeric acid                 | 0.43 (0.09 – 0.56)         | 0.38 (0.15 – 0.54)         | 0.707          |

The values of variables are presented with median and interquartile.

#### Abbreviations:

CA, cholic acid; CDCA, chenodeoxycholic acid; DCA, deoxycholic acid; G, glycine conjugated species; LCA, lithocholic acid; MDCA, murideoxycholic acid (murocholic acid); mM, millimolar; nM, nanomolar; T, taurine conjugated species; UCA, ursocholic acid; UDCA, ursodeoxycholic acid.

**Table S2. Characteristics of HCC patients in the validation cohort (After March 2020)**

| Characteristics                    | Validation cohort     |
|------------------------------------|-----------------------|
|                                    | N = 33                |
| Age, y                             | 66.3 (54.8 – 76.4)    |
| Sex (male), n (%)                  | 27 (81.8)             |
| HBsAg-positive, n (%)              | 19 (57.6)             |
| Anti-HCV-positive, n (%)           | 8 (24.2)              |
| Max. tumor size, cm                | 5.9 (2.6 – 10.3)      |
| Tumor > 50% liver volume, n (%)    | 4 (12.1)              |
| Multiple tumors, n (%)             | 29 (87.9)             |
| Portal vein invasion, n (%)        | 17 (51.5)             |
| Extrahepatic metastasis, n (%)     | 16 (48.5)             |
| AFP, ng/mL                         | 149.0 (13.0 – 7503.0) |
| ≥ 400 ng/mL, n (%)                 | 13 (39.4)             |
| BCLC stage B/C, n (%)              | 6/27 (18.2/81.8)      |
| Prothrombin time, INR              | 1.15 (1.09 – 1.26)    |
| Platelet count, K/cumm             | 200 (127 – 265)       |
| ALT, U/L                           | 37 (25 – 52)          |
| AST, U/L                           | 54 (41 – 92)          |
| Total bilirubin, mg/dL             | 0.71 (0.49 – 1.12)    |
| Albumin, g/dL                      | 3.8 (3.5 – 4.0)       |
| Neutrophil-lymphocyte ratio        | 3.76 (2.86 – 5.52)    |
| Presence of ascites, n (%)         | 11 (33.3)             |
| Child-Pugh score                   | 6 (5 – 6)             |
| Child-Pugh class A/B/C, n (%)      | 33/0/0 (100.0/0/0)    |
| ALBI grade 1/2/3, n (%)            | 12/21/0 (36.4/63.6/0) |
| First line systemic therapy, n (%) | 25 (75.8)             |
| Prior therapy to ICI, n (%)        |                       |
| Surgical resection                 | 12 (36.4)             |
| RFA                                | 11 (33.3)             |
| TACE                               | 18 (54.5)             |
| Sorafenib                          | 8 (24.2)              |
| Nivolumab/Pembrolizumab, n (%)     | 7/26 (21.2/78.8)      |
| Combined ICI with TKI, n (%)       | 28 (84.8)             |
| Immune-related AEs                 | 7 (21.2)              |

The values of continuous variables are presented with median and interquartile range

**Abbreviations:**

ALBI grade, albumin-bilirubin grade; AEs, adverse events; AFP, alpha fetoprotein; AL(S)T, alanine(aspartate) aminotransferase; BCLC stage, Barcelona-Clinic liver cancer stage; HBsAg, hepatitis B virus surface antigen; HCV, hepatitis C; ICI, immune checkpoint inhibitors; INR, international normalized ratio; NLR, neutrophil-lymphocyte ratio; RFA, radiofrequency ablation; TACE, trans-arterial chemoembolization; TKI, tyrosine kinase inhibitor.

**Table S3. Tumor response associated with gut microbial composition in validation group**

|                | <i>Prevotella 9</i> |                    | <i>Lachnoclostridium</i> |                    | <i>Lachnoclostridium-Prevotella 9</i> <sup>#</sup> |                |                |
|----------------|---------------------|--------------------|--------------------------|--------------------|----------------------------------------------------|----------------|----------------|
|                | Enriched<br>n = 11  | Depleted<br>n = 22 | Depleted<br>n = 7        | Enriched<br>n = 26 | Poor<br>n = 4                                      | Fair<br>n = 10 | Good<br>n = 19 |
| PR             | 2 (18.2)            | 10 (45.5)          | 0                        | 12 (46.2)          | 0 (0)                                              | 2 (20.0)       | 10 (52.6)      |
| SD             | 5 (45.5)            | 10 (45.5)          | 2 (28.6)                 | 13 (50.0)          | 0 (0)                                              | 7 (70.0)       | 8 (42.1)       |
| PD             | 4 (36.4)            | 2 (9.1)            | 5 (71.4)                 | 1 (3.8)            | 4 (100.0)                                          | 1 (10.0)       | 1 (5.3)        |
| ORR            | 2 (18.2)            | 10 (45.5)          | 0 (0)                    | 12 (46.2)          | 0 (0)                                              | 2 (20.0)       | 10 (52.6)      |
| <i>p</i> value | 0.249               |                    | 0.032                    |                    | 0.060                                              |                |                |
| DCR            | 7 (63.6)            | 20 (90.9)          | 2 (28.6)                 | 25 (96.2)          | 0 (0)                                              | 9 (90.0)       | 18 (94.7)      |
| <i>p</i> value | 0.149               |                    | < 0.001                  |                    | < 0.001                                            |                |                |

<sup>#</sup>Signature of fecal microbiota

Good signature: coexistence of depleted *Prevotella 9* and enriched *Lachnoclostridium*

Poor signature: coexistence of enriched *Prevotella 9* and depleted *Lachnoclostridium*

Fair signature: coexistence of depleted both two bacteria or enriched both two bacteria

Abbreviations:

DCR, disease control rate; ORR, objective response rate; PD, progressive disease; PR, partial response; SD, stable disease.
