# Supplementary figures and images for: Gut microbiota and metabolites associate with outcomes of immune checkpoint inhibitor–treated unresectable hepatocellular carcinoma
Source: PubMed Central journal article supplement — J Immunother Cancer. 2022 Jun 22;10(6):e004779. doi: 10.1136/jitc-2022-004779 (PMC9226985; doi:10.1136/jitc-2022-004779), 2022-06-22

(A)

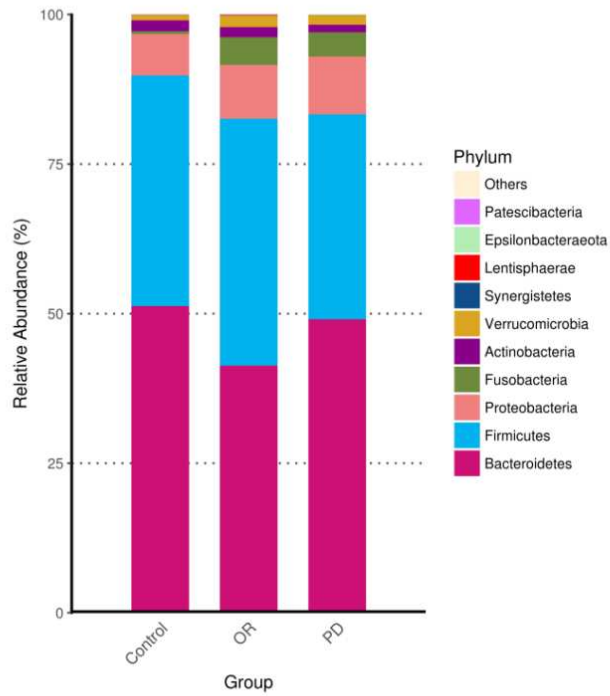

(B)

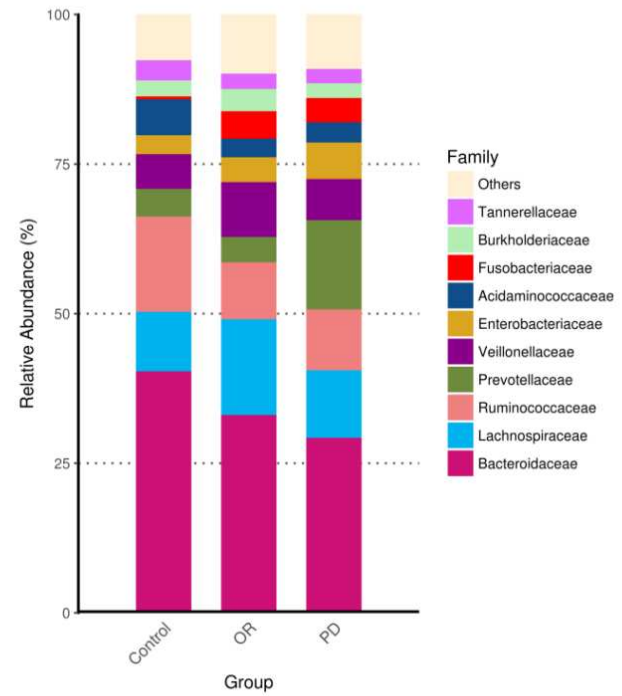

(C)

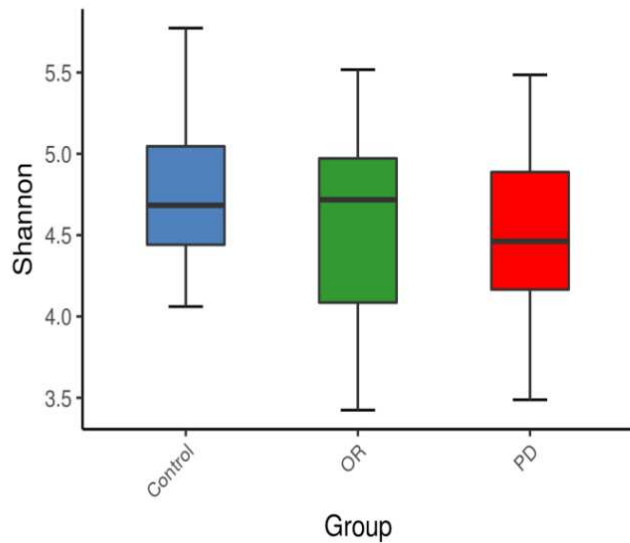

(D)

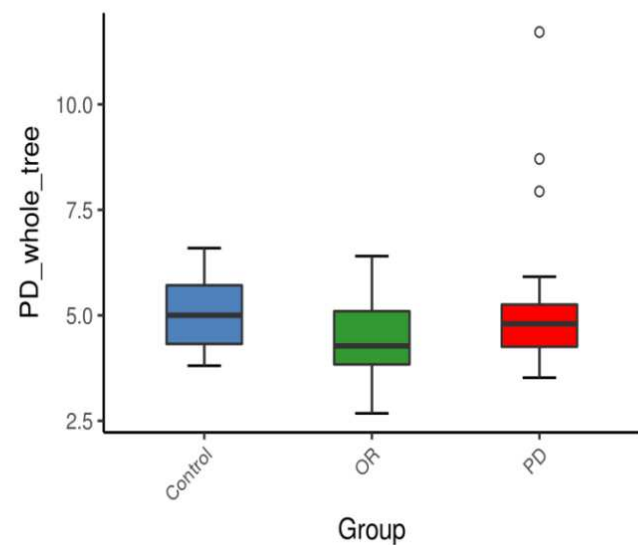

Supplement: jitc-2022-004779supp002.pdf [file jitc-2022-004779supp002.pdf]

(A)

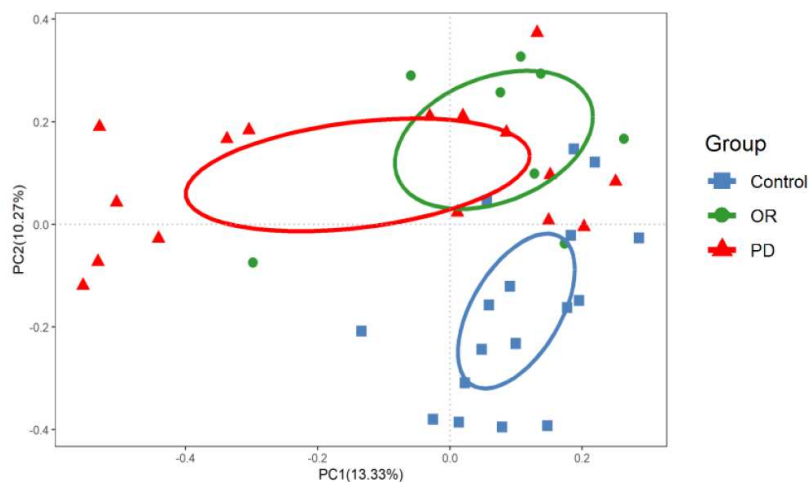

(B)

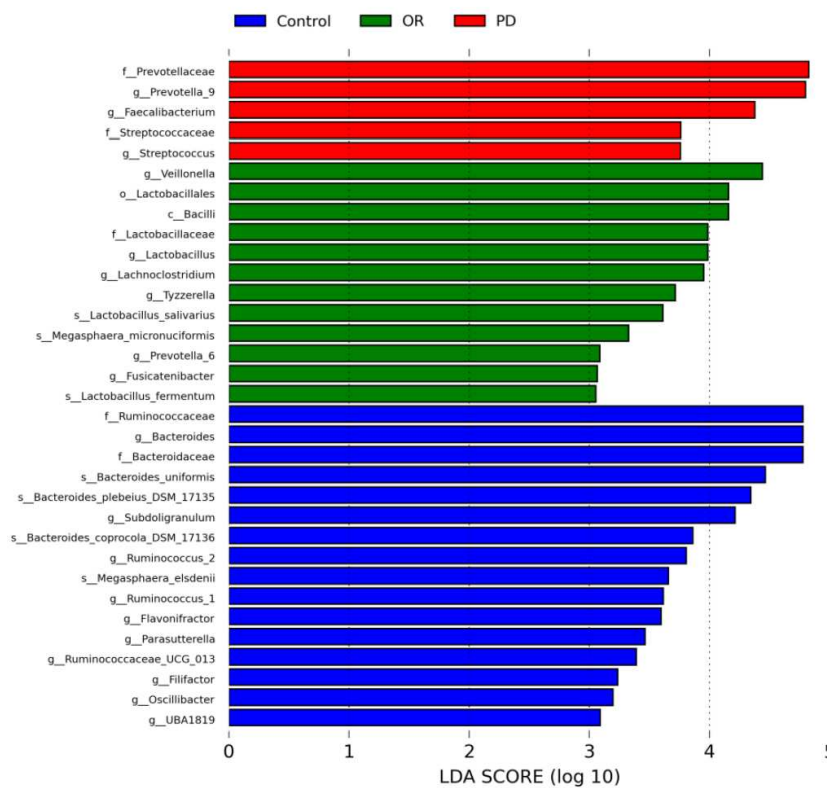

(C)

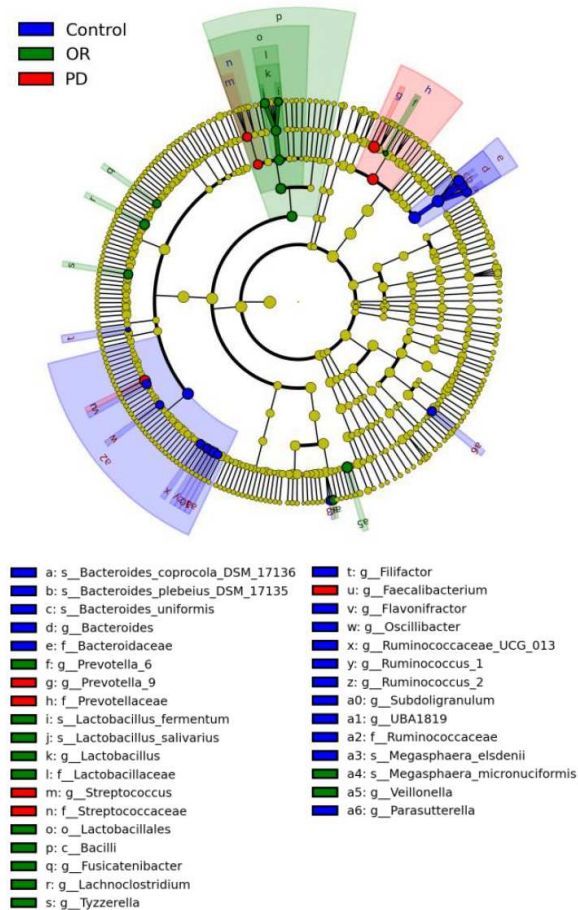

Supplement: jitc-2022-004779supp003.pdf [file jitc-2022-004779supp003.pdf]

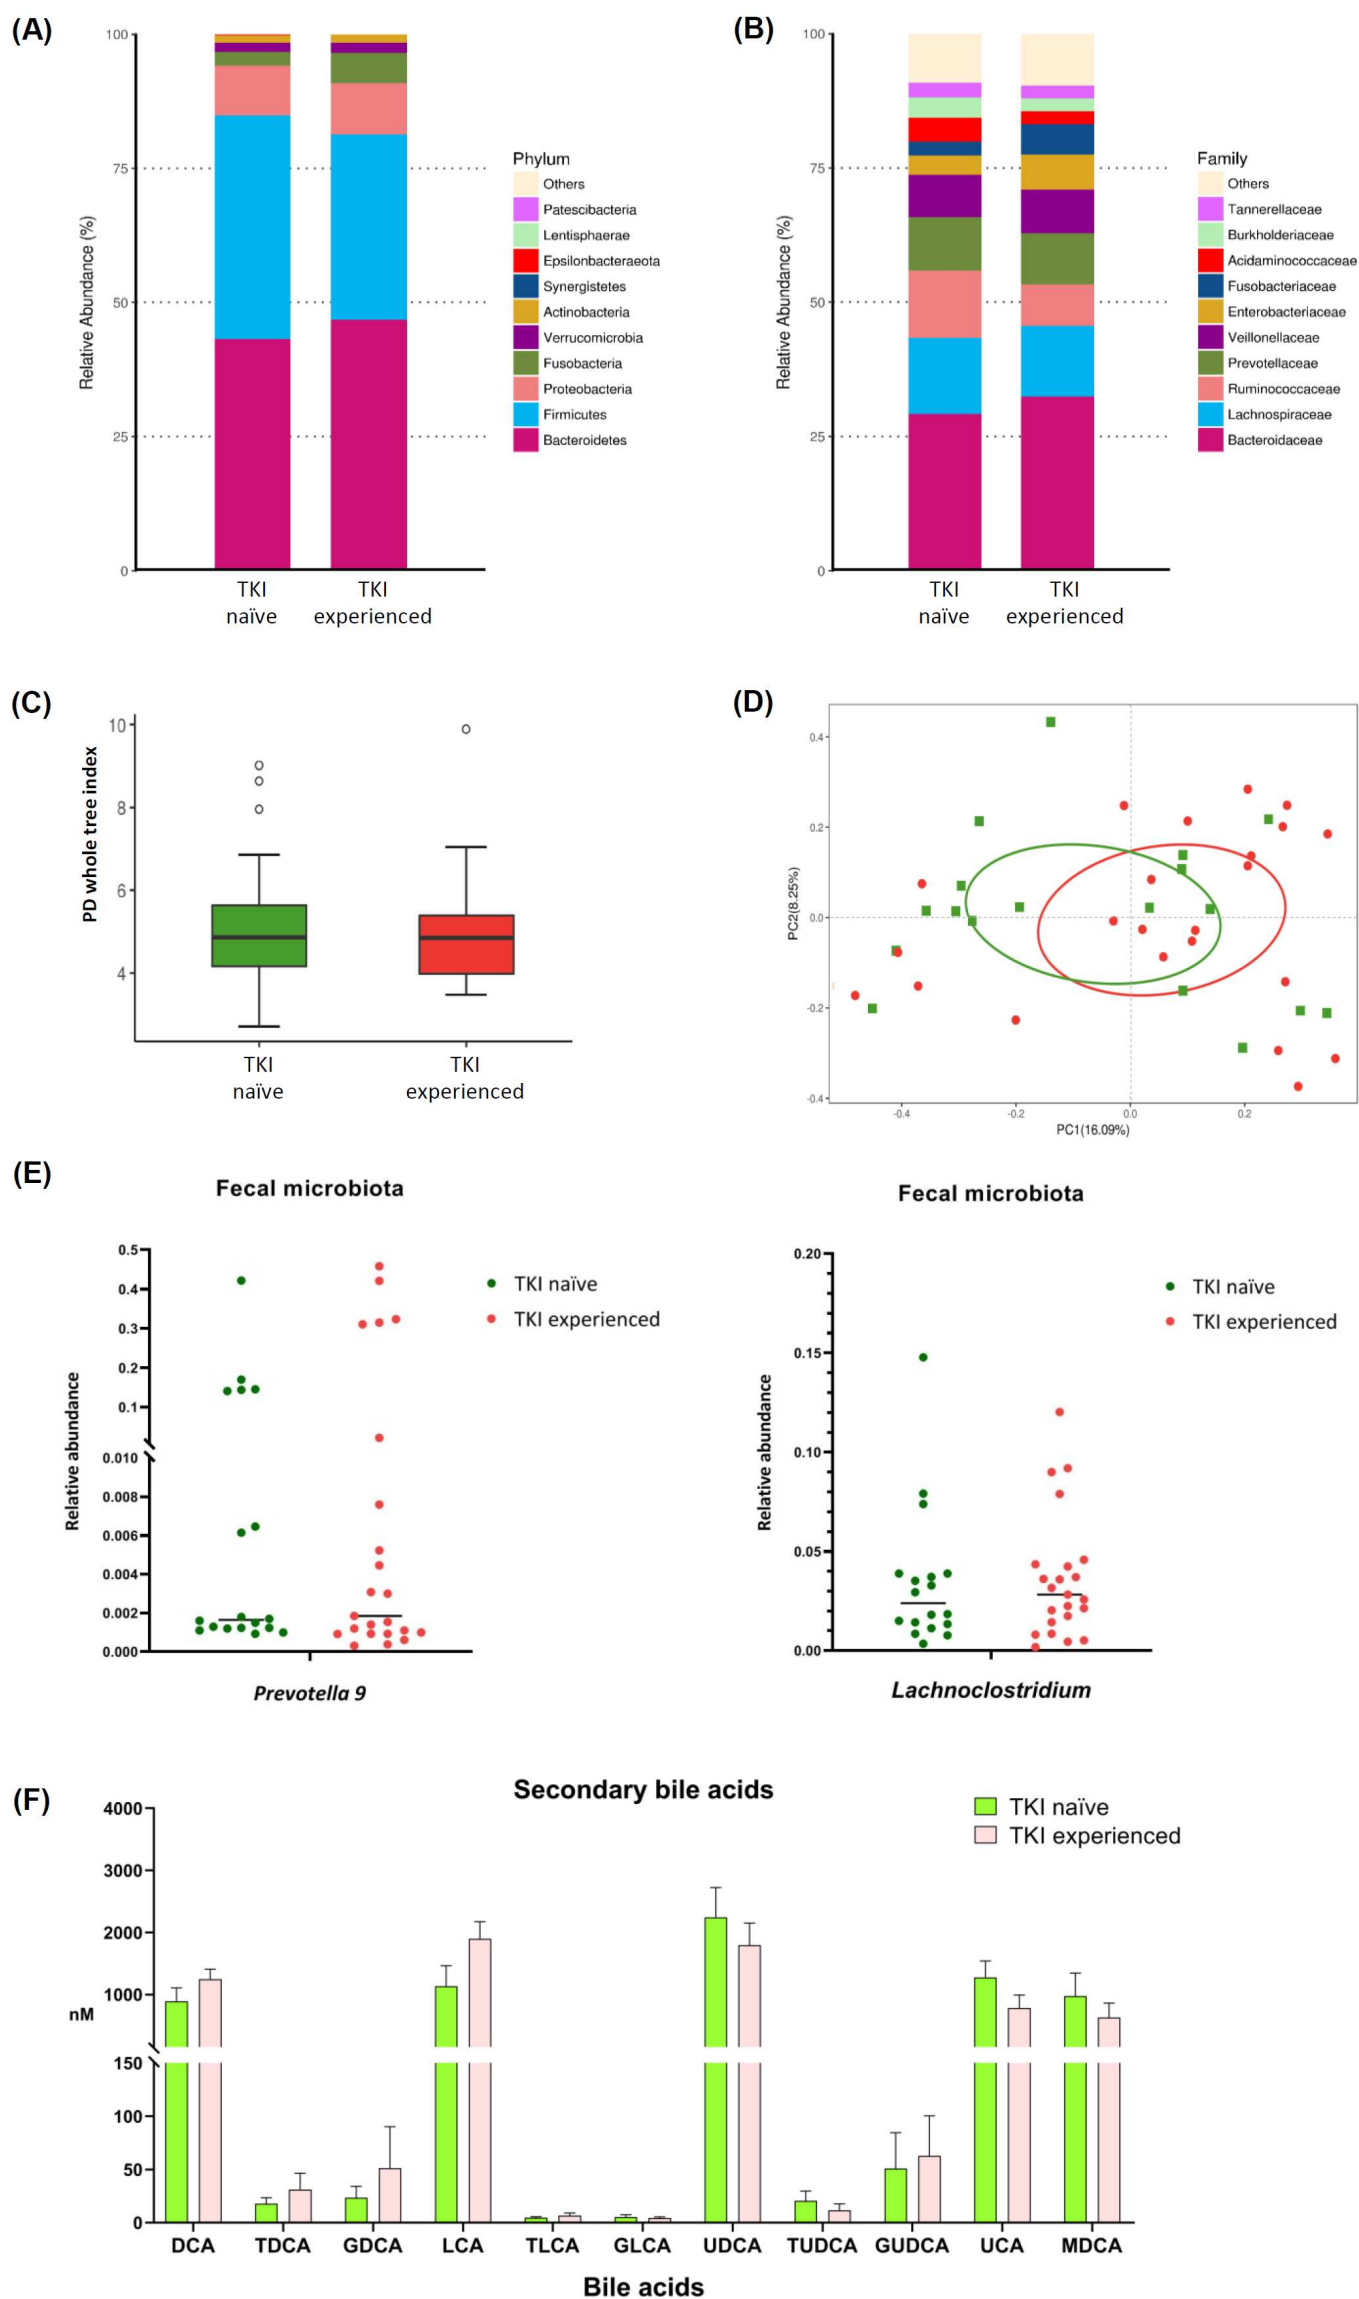

Supplement: jitc-2022-004779supp004.pdf [file jitc-2022-004779supp004.pdf]
